# Supplementary material for: SKAP1 Is a Novel Biomarker and Therapeutic Target for Gastric Cancer: Evidence from Expression, Functional, and Bioinformatic Analyses
Source: MDPI journal article supplement (doi:10.3390/ijms241411870), 2023-07-24
Supplement: s1 [file s1]

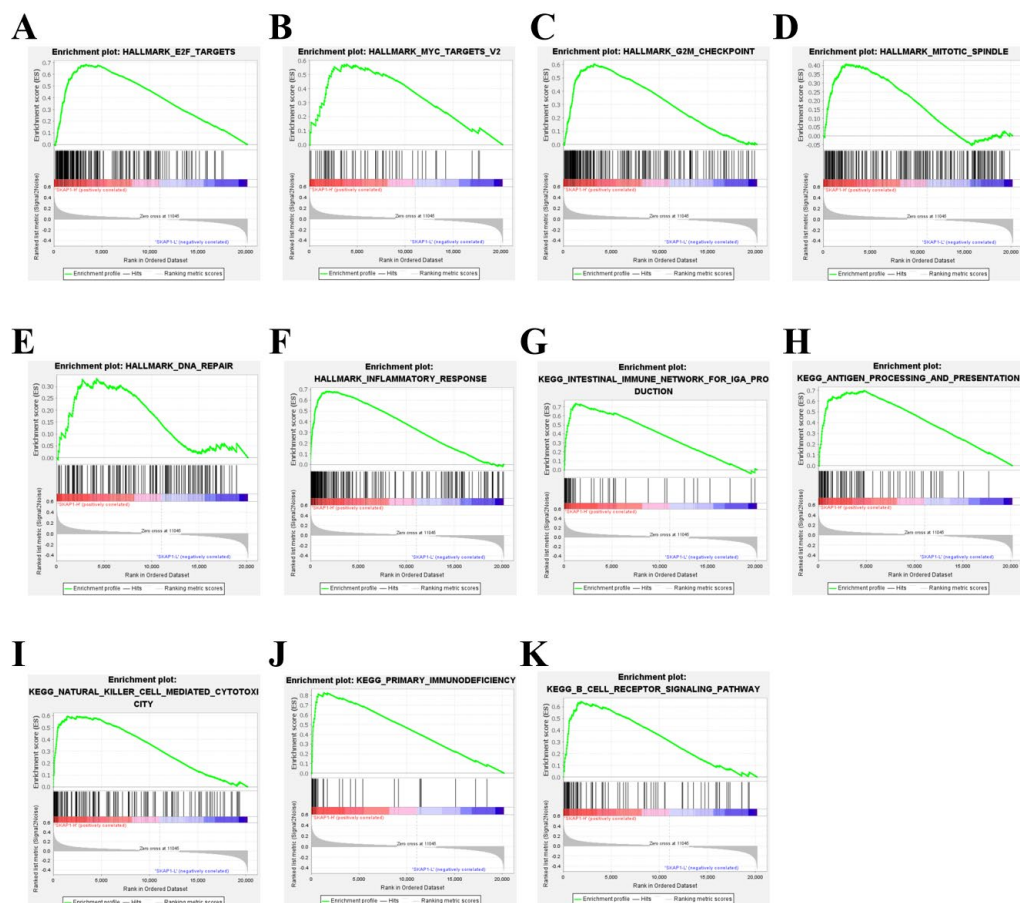

**Figure S1.** Gene Set Enrichment Analysis (GSEA) depicting the biological processes associated with datasets exhibiting high and low expression of SKAP1. A, E2F Targets; B, MYC Targets; C, G2M cell cycle checkpoint; D, Mtotic spindle formation; E, DNA repair; F, Inflammatory response; G, Intestinal immune network for IgA production; H, Antigen processing and presentation; I, Natural killer cell mediated cytotoxicity; J, Primary immunodeficiency; K, B cell receptor signaling pathway.

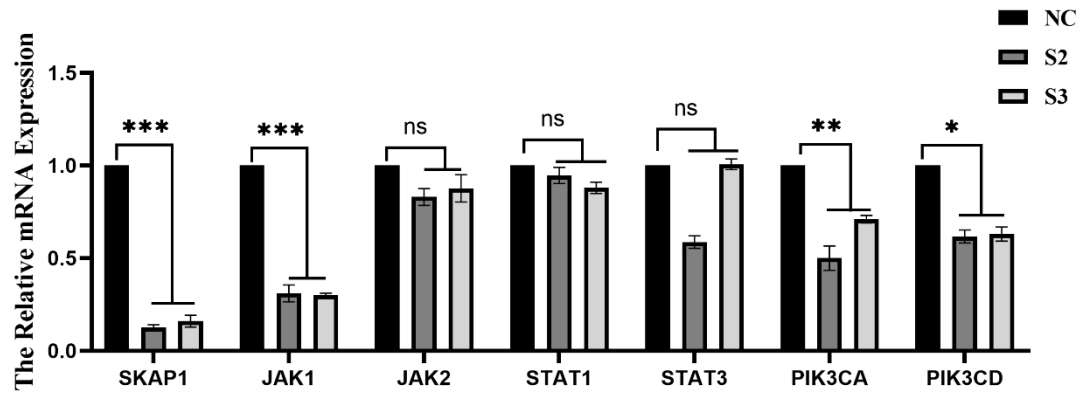

**Figure S2.** Quantitative Real-Time Polymerase Chain Reaction (qRT-PCR) analysis of mRNA levels of key genes within the JAK/STAT pathway and PI3K/AKT pathway following SKAP1 silencing. Negative control (NC) represents a scramble siRNA, while S2 and S3 represent siSKAP1-2, and siSKAP1-3 transfected cells, respectively. Statistical significance: The statistical significance is indicated as ns (no significance),  $*P < 0.05$ ,  $**P < 0.01$ ,  $***P < 0.001$ . The experiment was repeated independently three times.

**Table S1. Primer sequences.**

| Gene   |   | Primer sequence (5' -3')  |
|--------|---|---------------------------|
| GAPDH  | F | TGACTTCAACAGCGACACCCA     |
| GAPDH  | R | CACCCTGTTGCTGTAGCCAAA     |
| SKAP1  | F | CTGCGAAGAGATTCCAAGAAAG    |
| SKAP1  | R | TGCTGGACTAGTAGCTGTAAAC    |
| JAK1   | F | CTCACCAGGATGCGGATAAA      |
| JAK1   | R | AGTTTCCAAGGTAGCCAAGTAT    |
| JAK2   | F | TCTGGGGAGTATGTTGCAGAA     |
| JAK2   | R | AGACATGGTTGGGTGGATACC     |
| STAT1  | F | GACCCAATCCAGATGTCTATGA    |
| STAT1  | R | CCCGACTGAGCCTGATTA        |
| STAT3  | F | CCTTCCTGCTAAGATTCA        |
| STAT3  | R | GACTGGATCTGGGTCTTA        |
| PIK3CA | F | CCTGATCTTCCTCGTGCTGCTC    |
| PIK3CA | R | ATGCCAATGGACAGTGTTCCCTCTT |
| PIK3CD | F | CATATGTGCTGGGCATTGGC      |
| PIK3CD | R | TTTCACAGTAGCCCCGGAAC      |

**Table S2. siRNA sequences targeting SKAP1.**

| Gene             |           | Sequence (5' -3')      |
|------------------|-----------|------------------------|
| Negative control | sense     | UUCUCCGAACGUGUCACGUTT  |
|                  | antisense | ACGUGACACGUUCGGAGAATT  |
| SKAP1-siRNA-1    | sense     | CUGAAGAGUUUCUGGCAGATT  |
|                  | antisense | UCUGCCAGAAACUCUUCAGTT  |
| SKAP1-siRNA-2    | sense     | GAAUGGAAGACAUCGUAAATT  |
|                  | antisense | UUUACGAUGUCUCCAUUCTT   |
| SKAP1-siRNA-3    | sense     | GUUGUCAGCAGAGGUCUCUTT  |
|                  | antisense | AGAGACCUCUGCUGACAACCTT |

**Table S3. Correlation between SKAP1 and immune cell markers.**

| Description             | Gene Markers  | STAD  |                  |        |                    |
|-------------------------|---------------|-------|------------------|--------|--------------------|
|                         |               | Core  | None<br><i>P</i> | Core   | Purity<br><i>P</i> |
| CD8 <sup>+</sup> T cell | CD8A          | 0.349 | ***              | 0.366  | ***                |
|                         | CD8B          | 0.366 | ***              | 0.371  | ***                |
| T cell (general)        | CD3D          | 0.355 | ***              | 0.385  | ***                |
|                         | CD3E          | 0.338 | ***              | 0.371  | ***                |
|                         | CD2           | 0.35  | ***              | 0.383  | ***                |
| B cell                  | CD19          | 0.236 | ***              | 0.255  | ***                |
|                         | CD79A         | 0.232 | ***              | 0.266  | ***                |
| Monocyte                | CD86          | 0.248 | ***              | 0.277  | ***                |
|                         | CD115 (CSF1R) | 0.185 | ***              | 0.222  | ***                |
| TAM                     | CCL2          | 0.1   | 4.11e-02         | 0.111  | *                  |
|                         | CD68          | 0.153 | ***              | 0.184  | ***                |
|                         | IL10          | 0.248 | ***              | 0.259  | ***                |
| M1 Macrophage           | iNOS (ISYNA1) | 0.118 | **               | 0.116  | *                  |
|                         | iNOS (NOS2)   | 0.006 | 9.01e-01         | -0.008 | 8.7e-01            |
|                         | IRF5          | 0.322 | ***              | 0.352  | ***                |
|                         | COX2 (PTGS2)  | 0.041 | 4.03e-01         | 0.048  | 3.51e-01           |
| M2 Macrophage           | CD163         | 0.175 | ***              | 0.198  | ***                |
|                         | VSIG4         | 0.161 | ***              | 0.175  | ***                |
|                         | MS4A4A        | 0.197 | ***              | 0.214  | ***                |
| Neutrophils             | CD66b         | 0.108 | *                | 0.087  | 8.98e-02           |
|                         | (CEACAM8)     |       |                  |        |                    |
|                         | CD11b (ITGAM) | 0.288 | ***              | 0.315  | ***                |
| Natural killer cell     | CCR7          | 0.246 | ***              | 0.275  | ***                |
|                         | KIR2DL1       | 0.119 | *                | 0.084  | 1.04e-01           |
|                         | KIR2DL3       | 0.101 | *                | 0.092  | 7.48e-02           |
|                         | KIR2DL4       | 0.228 | ***              | 0.205  | ***                |
|                         | KIR3DL1       | 0.169 | ***              | 0.157  | **                 |
|                         | KIR3DL2       | 0.237 | ***              | 0.226  | ***                |
|                         | KIR3DL3       | 0.051 | 3.04e-01         | 0.028  | 5.92e-01           |
|                         | KIR2DS4       | 0.137 | **               | 0.117  | *                  |
|                         |               |       |                  |        |                    |
| Dendritic cell          | HLA-DPB1      | 0.321 | ***              | 0.351  | ***                |
|                         | HLA-DQB1      | 0.207 | ***              | 0.223  | ***                |
|                         | HLA-DRA       | 0.301 | ***              | 0.323  | ***                |
|                         | HLA-DPA1      | 0.308 | ***              | 0.335  | ***                |
|                         | BCDA-1 (CD1C) | 0.178 | ***              | 0.216  | ***                |
|                         | BCDA-4 (NRP1) | 0.095 | 5.43e-02         | 0.123  | *                  |
|                         | CD11c (ITGAX) | 0.224 | ***              | 0.243  | ***                |
| Th1                     | T-bet (TBX21) | 0.332 | ***              | 0.338  | ***                |

|      |                      |       |          |       |          |
|------|----------------------|-------|----------|-------|----------|
| Th2  | STAT4                | 0.381 | ***      | 0.411 | ***      |
|      | STAT1                | 0.274 | ***      | 0.303 | ***      |
|      | IFN- $\gamma$ (IFNG) | 0.306 | ***      | 0.306 | ***      |
|      | TNF- $\alpha$ (TNF)  | 0.169 | ***      | 0.19  | ***      |
|      | GATA3                | 0.3   | ***      | 0.299 | ***      |
|      | STAT6                | 0.124 | *        | 0.158 | ***      |
|      | STAT5A               | 0.372 | ***      | 0.391 | ***      |
| Tfh  | IL13                 | 0.052 | 2.92e-01 | 0.057 | 2.7e-01  |
|      | BCL6                 | 0.101 | *        | 0.118 | *        |
|      | IL21                 | 0.276 | ***      | 0.279 | ***      |
| Th17 | STAT3                | 0.151 | **       | 0.175 | ***      |
|      | IL17A                | 0.007 | 8.89e-01 | 0.024 | 6.42e-01 |
| Treg | FOXP3                | 0.328 | ***      | 0.347 | ***      |
|      | CCR8                 | 0.312 | ***      | 0.324 | ***      |
|      | STAT5B               | 0.21  | ***      | 0.25  | ***      |
|      | TGF- $\beta$ (TGFB1) | 0.202 | ***      | 0.23  | ***      |
| Tex  | PD-1 (PDCD1)         | 0.372 | ***      | 0.383 | ***      |
|      | CTLA4                | 0.342 | ***      | 0.345 | ***      |
|      | LAG3                 | 0.326 | ***      | 0.339 | ***      |
|      | TIM-3 (HAVCR2)       | 0.257 | ***      | 0.284 | ***      |
|      | GZMB                 | 0.256 | ***      | 0.262 | ***      |

---

Note: Core: Spearman's rho value. Statistical significance: \* $P < 0.05$ , \*\* $P < 0.01$ , \*\*\* $P < 0.001$ .
